# Supplementary material
Source: Springer Nature journal article supplement (https://www.springermedizin.de/resource/supplementary/12939_2008_128_MOESM2_ESM.pdf/9551544)

Newly Reported HIV Infected People

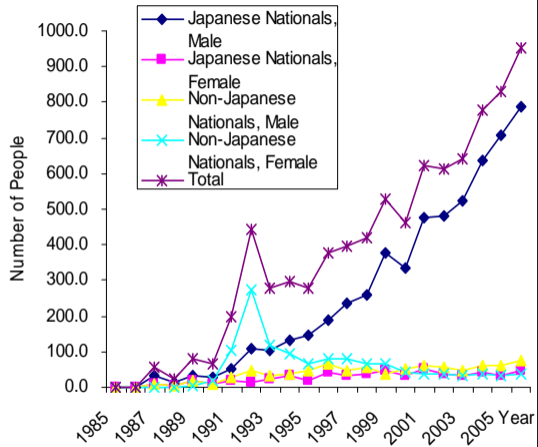

Newly Reported AIDS Patients

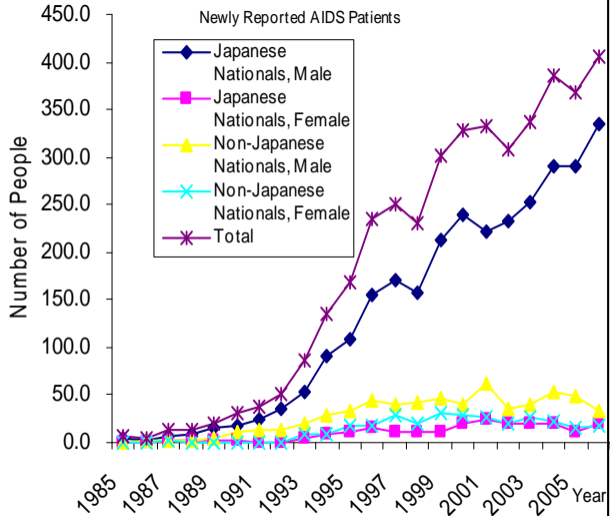

Supplement: MOESM2 [file 9551544]
